# Supplementary material
Source: HighWire-hosted journal article supplement (https://www.annfammed.org/highwire/filestream/7661/field_highwire_adjunct_files/0/PottieApp.pdf)
Supplement: PottieApp.pdf [file PottieApp.pdf]

**Online Supplementary Material**

Pottie K, Haydt S, Farrell B, Dolovich L, Sellors C, Hogg W. Narrative reports to monitor and evaluate the integration of pharmacists into family practice settings. *Ann Fam Med*. 2008;6(2):161-165.

<http://www.annfammed.org/cgi/content/full/6/2/161/DC1>

**Supplemental Appendix. Pharmacist’s Monthly Narrative Report  
 (Due: First Monday of each month at 5 PM)**

Date: \_\_\_\_\_

Pharmacist name: \_\_\_\_\_

Site name: \_\_\_\_\_

**Time Log:** Reflect on your last 4 weeks in the practice and estimate how much time you spent on each of the following program activities.

| Pharmacist Program Activity                                                                                        | Percentage of Office Time Spent on Tasks<br>(Should Total 100) |
|--------------------------------------------------------------------------------------------------------------------|----------------------------------------------------------------|
| Patient medication assessments (assessments, writing reports, discussing reports with physicians, sending reports) |                                                                |
| Providing drug information                                                                                         |                                                                |
| Drug therapy education activities                                                                                  |                                                                |
| Developing office system medication management innovations (include shadowing/ observation time)                   |                                                                |
| IMPACT administration evaluation activities                                                                        |                                                                |

1. Describe your personal observations of the office practice and how your proposed or active pharmacist activities may enhance or hinder the current practice system (ie, consensus building, getting buy-in on pharmacist program activities, patient assessments, educational activities, developing office system innovations).
2. Describe specific experiences regarding the usefulness of specific integration activities on your personal and professional integration process, gaining personal understanding and professional recognition within the practice (ie, practice site profile, implementation guide, “meet and greet” physician encounters, practice shadowing/observation, mentor, presentations to staff, etc). Please highlight your personal approach and ideas for integration, in the short term and the long term.
3. Describe experiences that illustrate specific challenges and/or barriers that you have encountered (areas to think about would include your interaction with physicians, office staff, and patients).
4. Describe the current state of the practice as you see it with regard to drug therapy and how you think pharmacist-assisted system innovation can occur in the short term and in the long term (ie, education/health promotion initiatives, medication management system innovations, renewals, monitoring, etc).
5. Use this section to relate any other “lessons learned,” success stories, discuss any feedback you have received, or list any items or concerns that would be worth discussing with the other pharmacists.
